# Supplementary material for: Structural, Optical, and Electrical Properties of Copper Oxide Films Grown by the SILAR Method with Post-Annealing
Source: MDPI journal article supplement (doi:10.3390/coatings11070864), 2021-07-19
Supplement: s1 [file s1]

# Supplementary Materials: Structural, Optical, and Electrical Properties of Copper Oxide Films Grown by the SILAR Method with Post-Annealing

Wen-Jen Lee \* and Xin-Jin Wang

Department of Applied Physics, National Pingtung University, Pingtung 900, Taiwan; jim40929@gmail.com

\* Correspondence: wenjenlee@mail.nptu.edu.tw; Tel.: +886-8-7663800 (ext.33466)

## Sample Preparation for Cross-Sectional Analysis of SEM

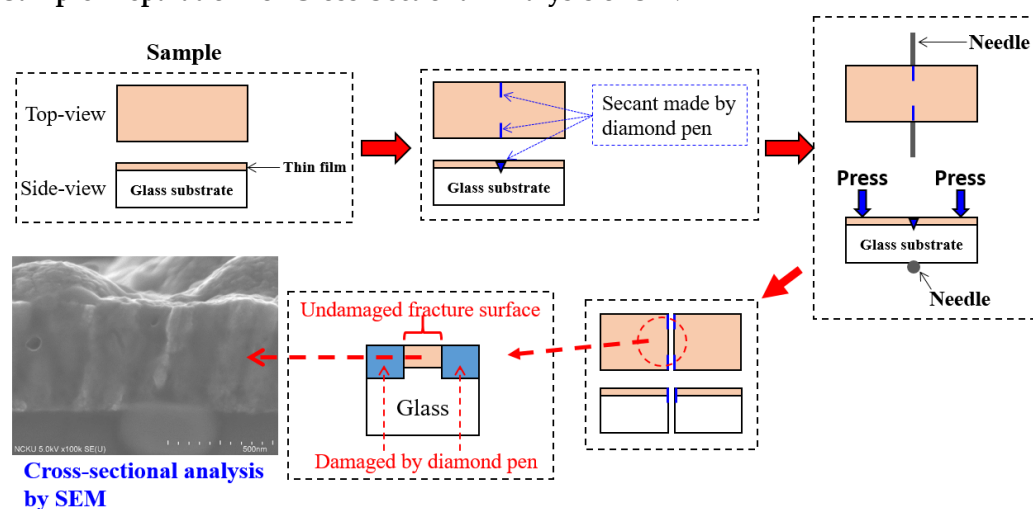

**Citation:** Lee, W.-J.; Wang, X.-J. Structural, Optical, and Electrical Properties of Copper Oxide Films Grown by SILAR Method with Post-Annealing. *Coatings* **2021**, *11*, 864. <https://doi.org/10.3390/coatings11070864>

Academic Editor: Angela De Bonis

Received: 30 June 2021

Accepted: 16 July 2021

Published: 19 July 2021

**Publisher's Note:** MDPI stays neutral with regard to jurisdictional claims in published maps and institutional affiliations.

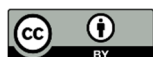

**Copyright:** © 2021 by the authors. Submitted for possible open access publication under the terms and conditions of the Creative Commons Attribution (CC BY) license (<http://creativecommons.org/licenses/by/4.0/>).

**Figure S1.** Graphical explanation of how to prepare the samples for cross-sectional analysis of SEM.

## Sample Preparation for Hall Effect Measurement

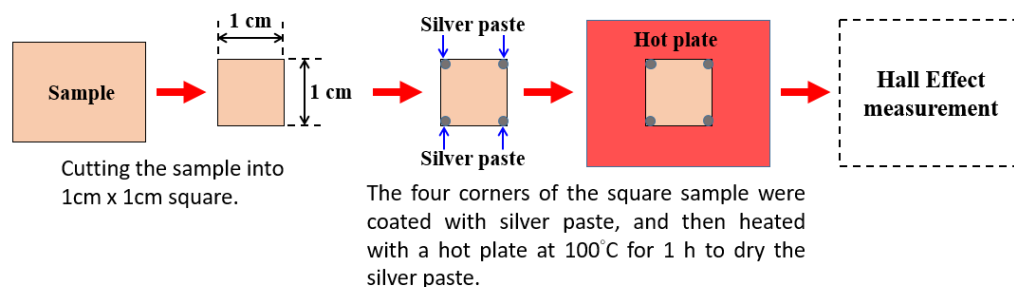

**Figure S2.** Graphical explanation of how to prepare the samples for Hall Effect measurement.
