# Supplementary material for: Structural, Optical, and Electrical Properties of Copper Oxide Films Grown by the SILAR Method with Post-Annealing
Source: MDPI journal article supplement (doi:10.3390/coatings11070864), 2021-07-19
Supplement: s1 [file s1]

Archive with 1 entries (1 files):
- coatings-1299617-supplementary.pdf
